# Supplementary material for: Comparative Genomics and Functional Studies of Putative m6A Methyltransferase (METTL) Genes in Cotton
Source: MDPI journal article supplement (doi:10.3390/ijms232214111), 2022-11-15
Supplement: s1 [file s1]

**Table S1.** List of forward and reverse primers used for this study.

| Primer              | Sequence (5'-3')          | Purpose                   |
|---------------------|---------------------------|---------------------------|
| Kan-F               | GGCGATACCGTAAAGCACGAGGAA  | Transgenic identification |
| Kan-R               | GCTATGACTGGGCACAACAGACAAT | Transgenic identification |
| GhMETTL3-OE-F       | ATGGAGAGCAACTCAGGCGG      | Overexpression            |
| GhMETTL3-OE-R       | TCAGGTGGTCATATCAGTATCTAC  | Overexpression            |
| GhMETTL14-OE-F      | ATGGATTCTCCTGAGCGTAGC     | Overexpression            |
| GhMETTL14-OE-R      | CTACATTAAATTCATTGGTCTATG  | Overexpression            |
| GhMETTL3-VIGS-F     | CGAACACGGTTAGTTCGAGA      | VIGS                      |
| GhMETTL3-VIGS-R     | GTCTCTGTGACGGCAAAAGG      | VIGS                      |
| GhMETTL14-VIGS-F    | AACAGATGGGCCTCCCAATG      | VIGS                      |
| GhMETTL14-VIGS-R    | TCTTTCAGGCGGTGTTCCCTC     | VIGS                      |
| GhMETTL3-RT-F       | GCGGCAACCCATTGTTGATG      | qRT-PCR                   |
| GhMETTL3-RT-R       | AACCGTGTTCCGGTCGATGC      | qRT-PCR                   |
| GhMETTL14-RT-F      | GGAGGAGGAGTTCTGGGGAT      | qRT-PCR                   |
| GhMETTL14-RT-R      | GCATGTCCTTTACCACCGGA      | qRT-PCR                   |
| <i>GhHIS3</i> -RT-F | GAAGCCTCATCGATACCGTC      | qRT-PCR                   |
| <i>GhHIS3</i> -RT-R | CTACCACTACCATCATGG        | qRT-PCR                   |
