# Supplementary material for: Comparative Genomics and Functional Studies of Putative m6A Methyltransferase (METTL) Genes in Cotton
Source: MDPI journal article supplement (doi:10.3390/ijms232214111), 2022-11-15

**A** Calcium-binding protein genes

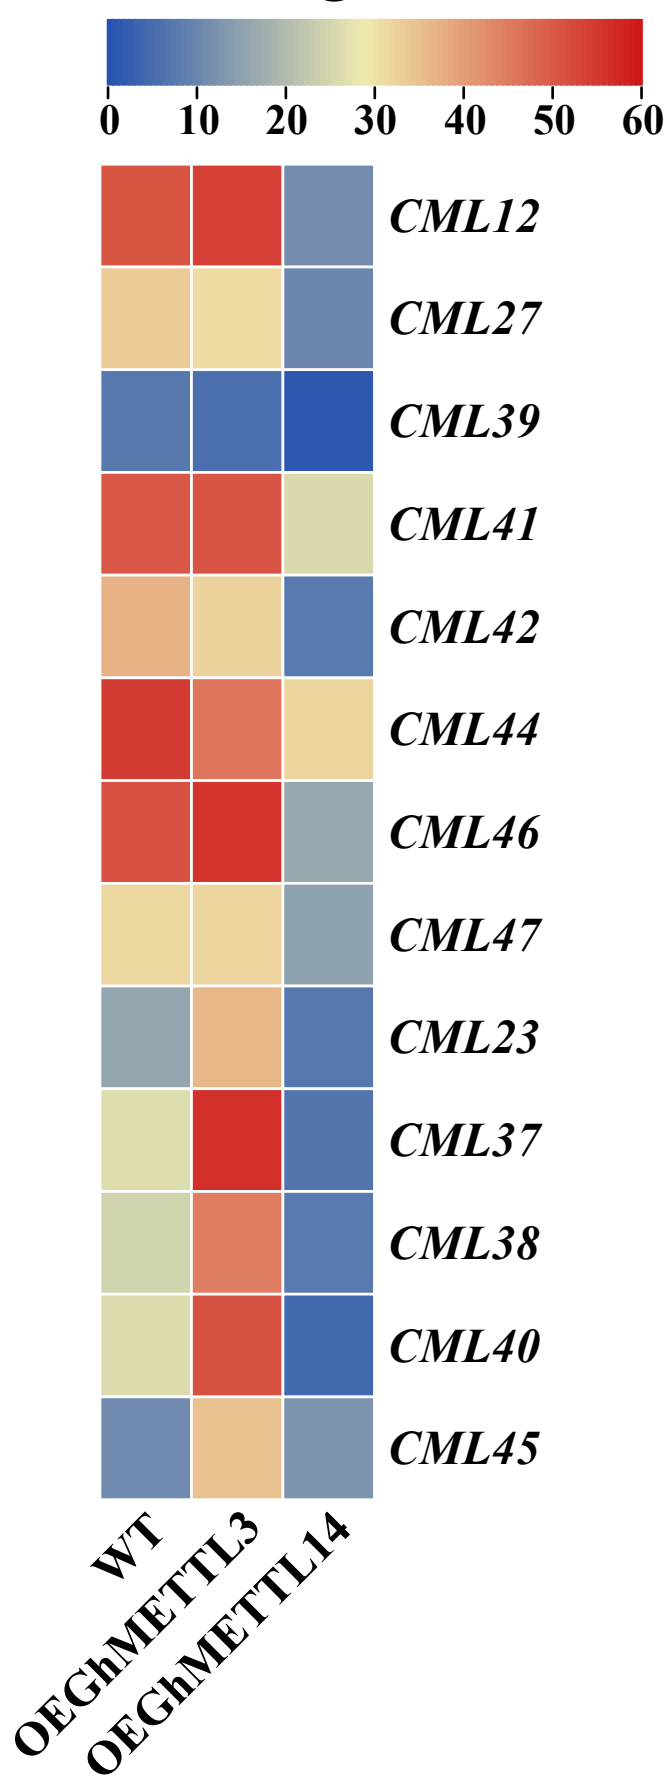

**B** Ethylene-responsive transcription factor genes

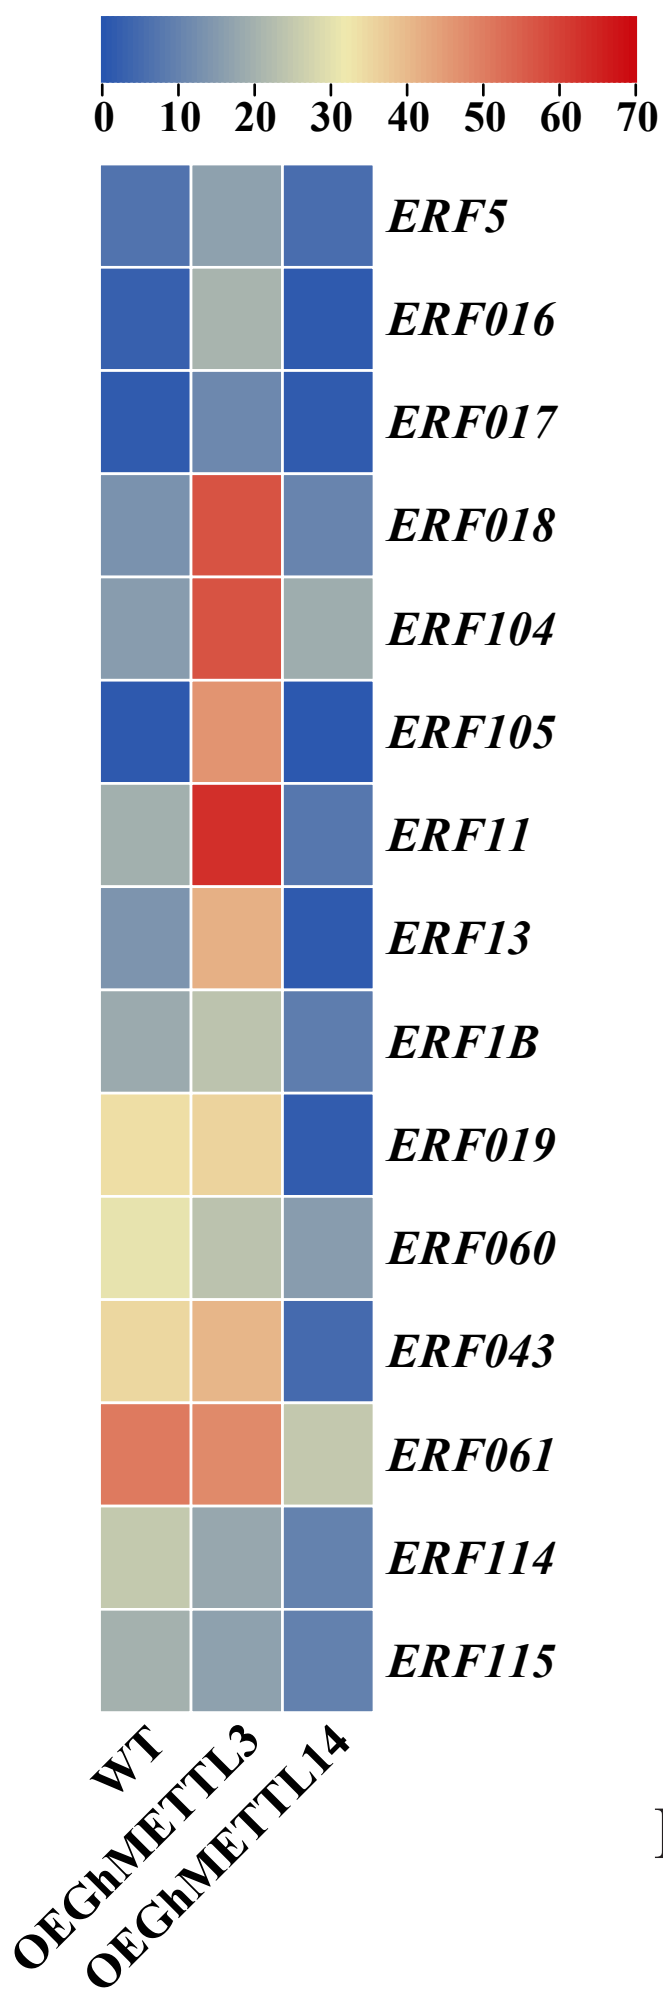

**C** WRKY TF genes

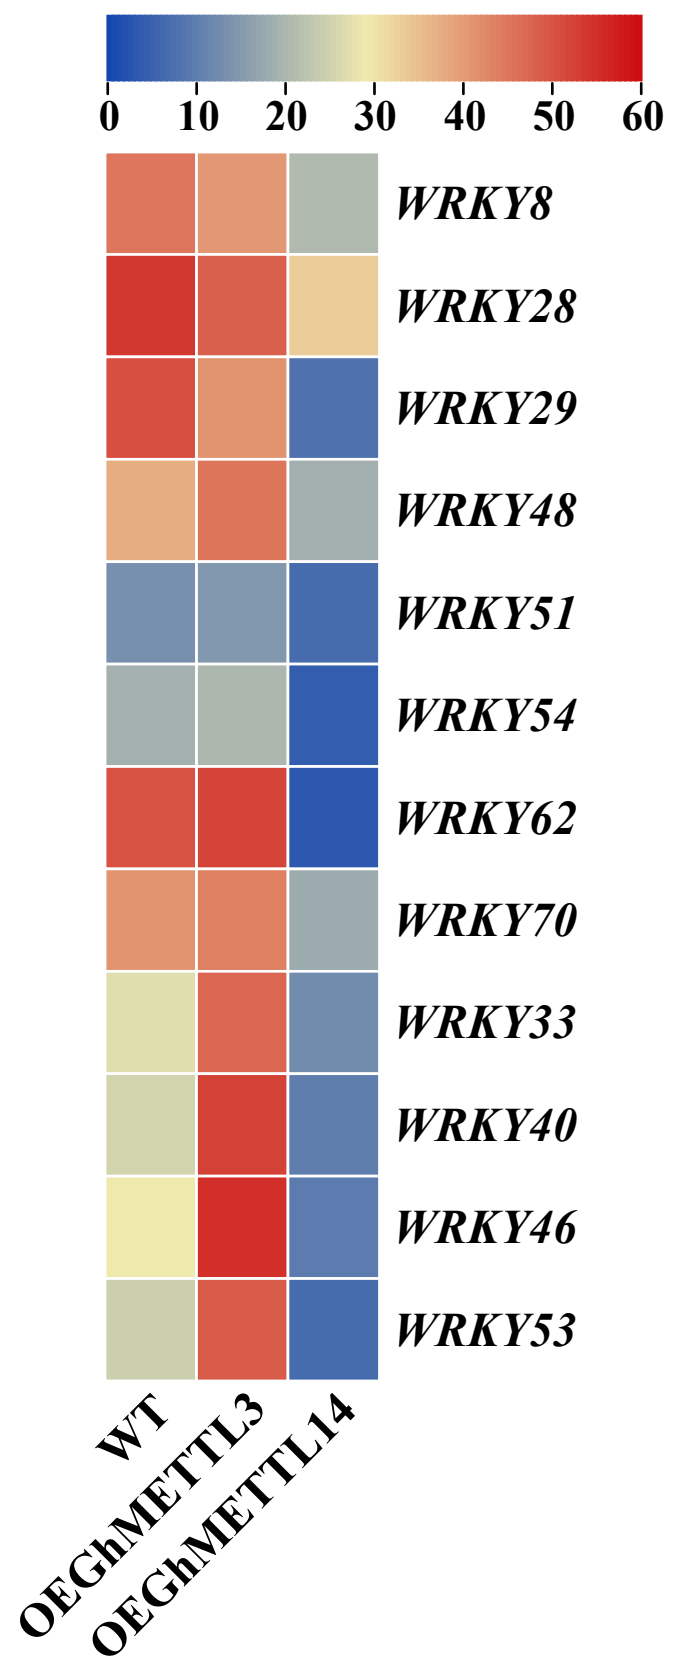

**D** CCR4-associated factor 1 homolog genes

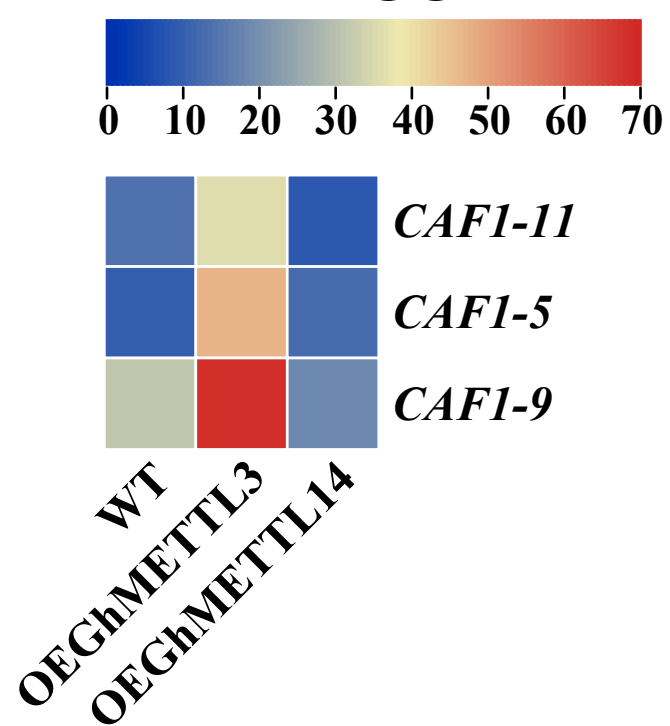

**E** Xyloglucan hydrolase genes

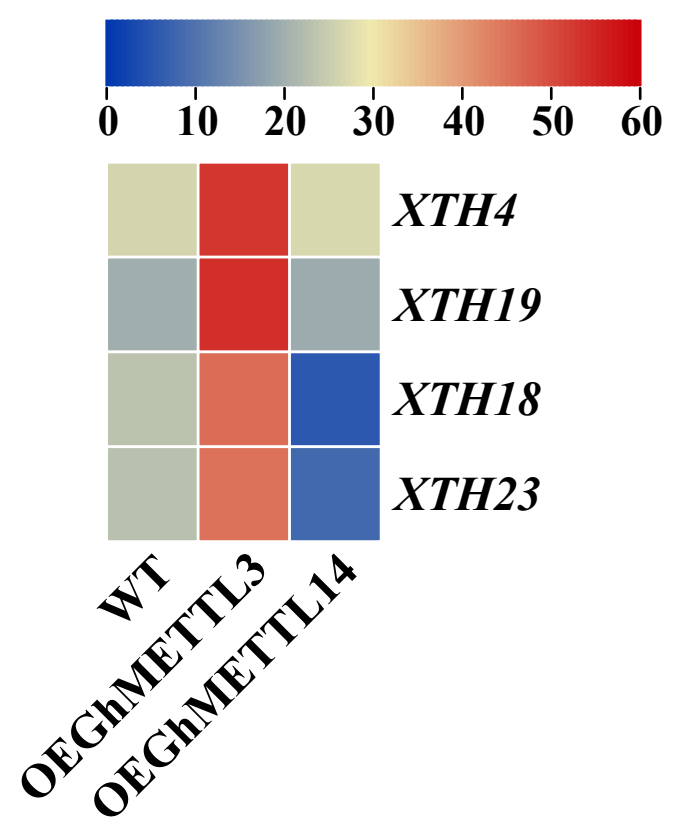

Supplement: s1 [file s1]
