# Supplementary figures and images for: Comparative Genomics and Functional Studies of Putative m6A Methyltransferase (METTL) Genes in Cotton
Source: MDPI journal article supplement (doi:10.3390/ijms232214111), 2022-11-15

A

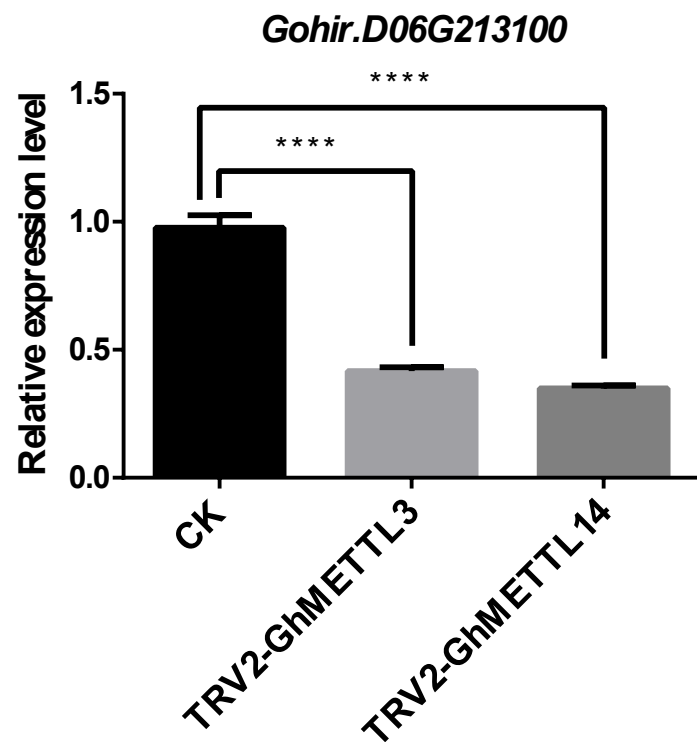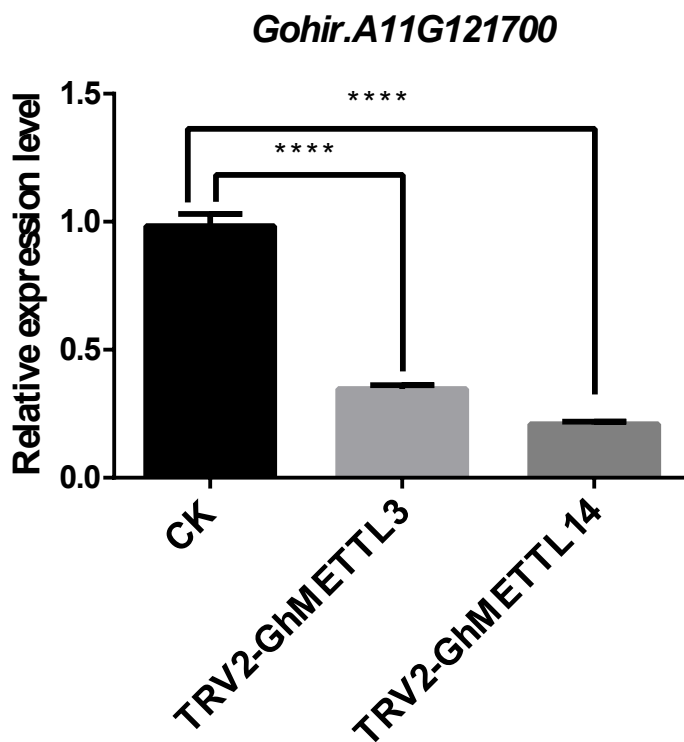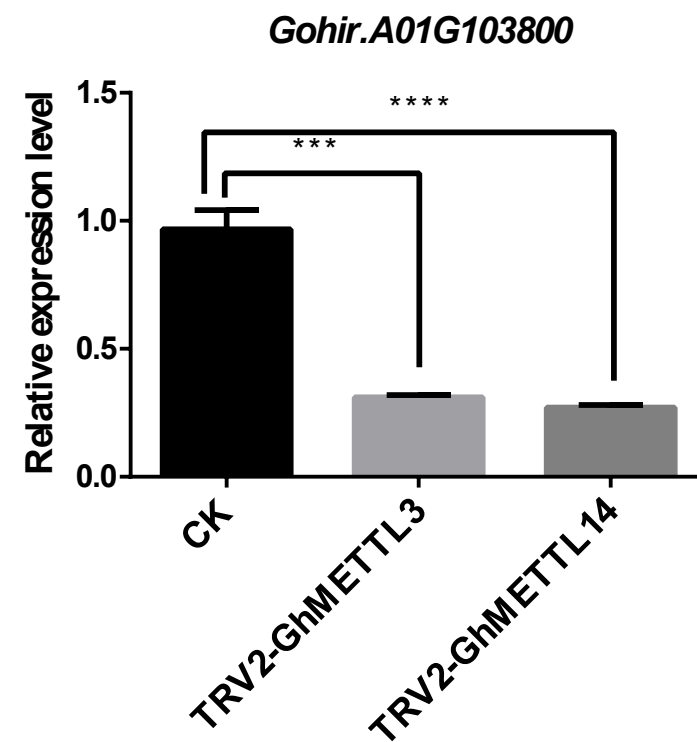

B

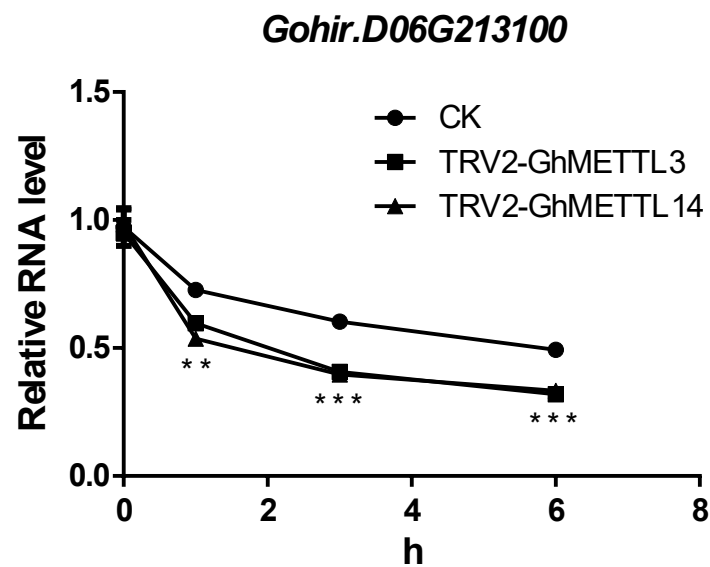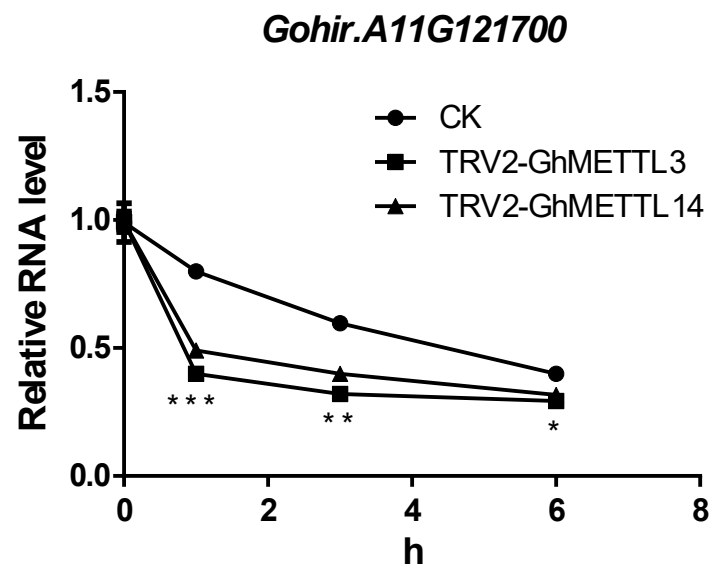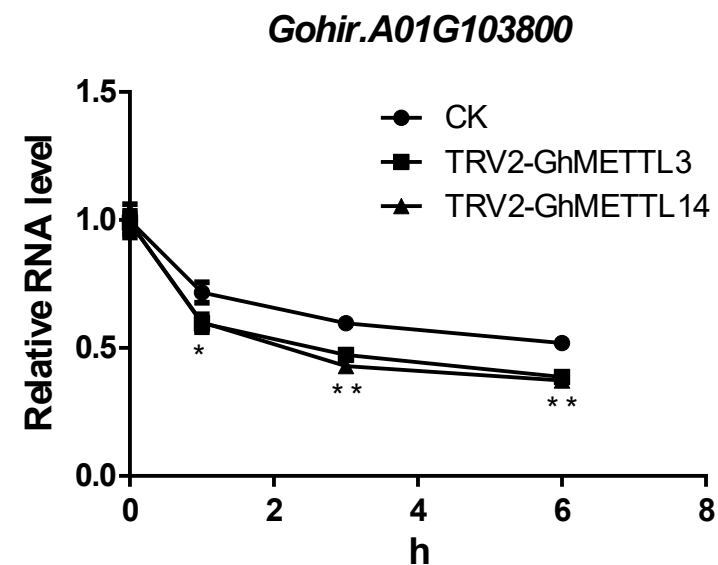

Supplement: s1 [file s1]

**A**

## KEGG enrichment analysis

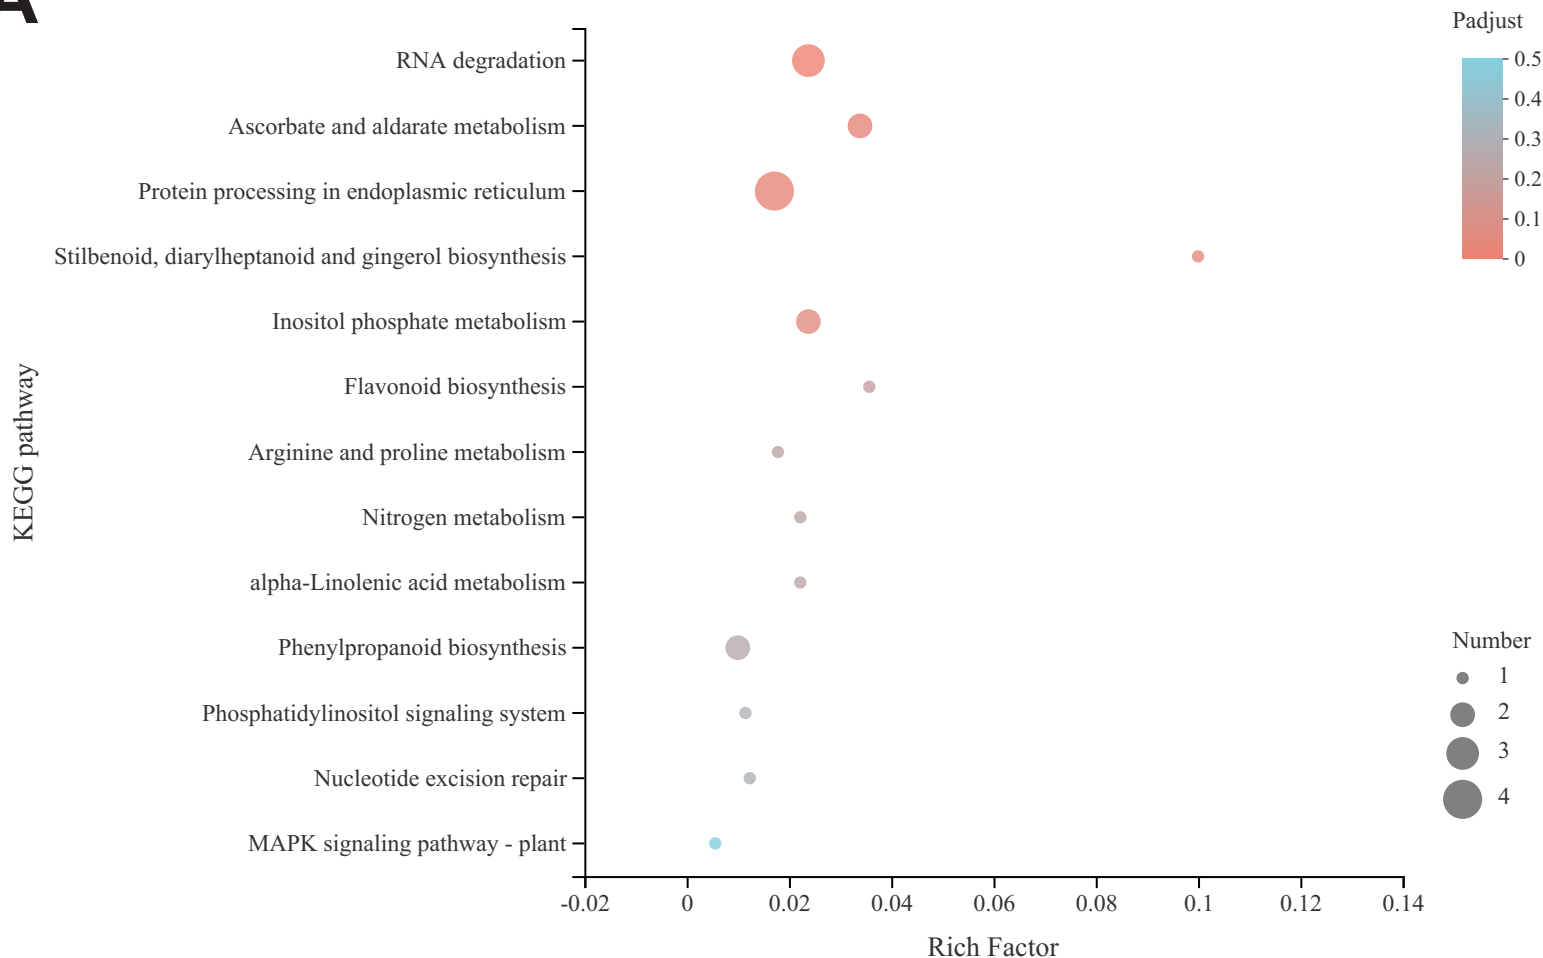

# B

## KEGG enrichment analysis

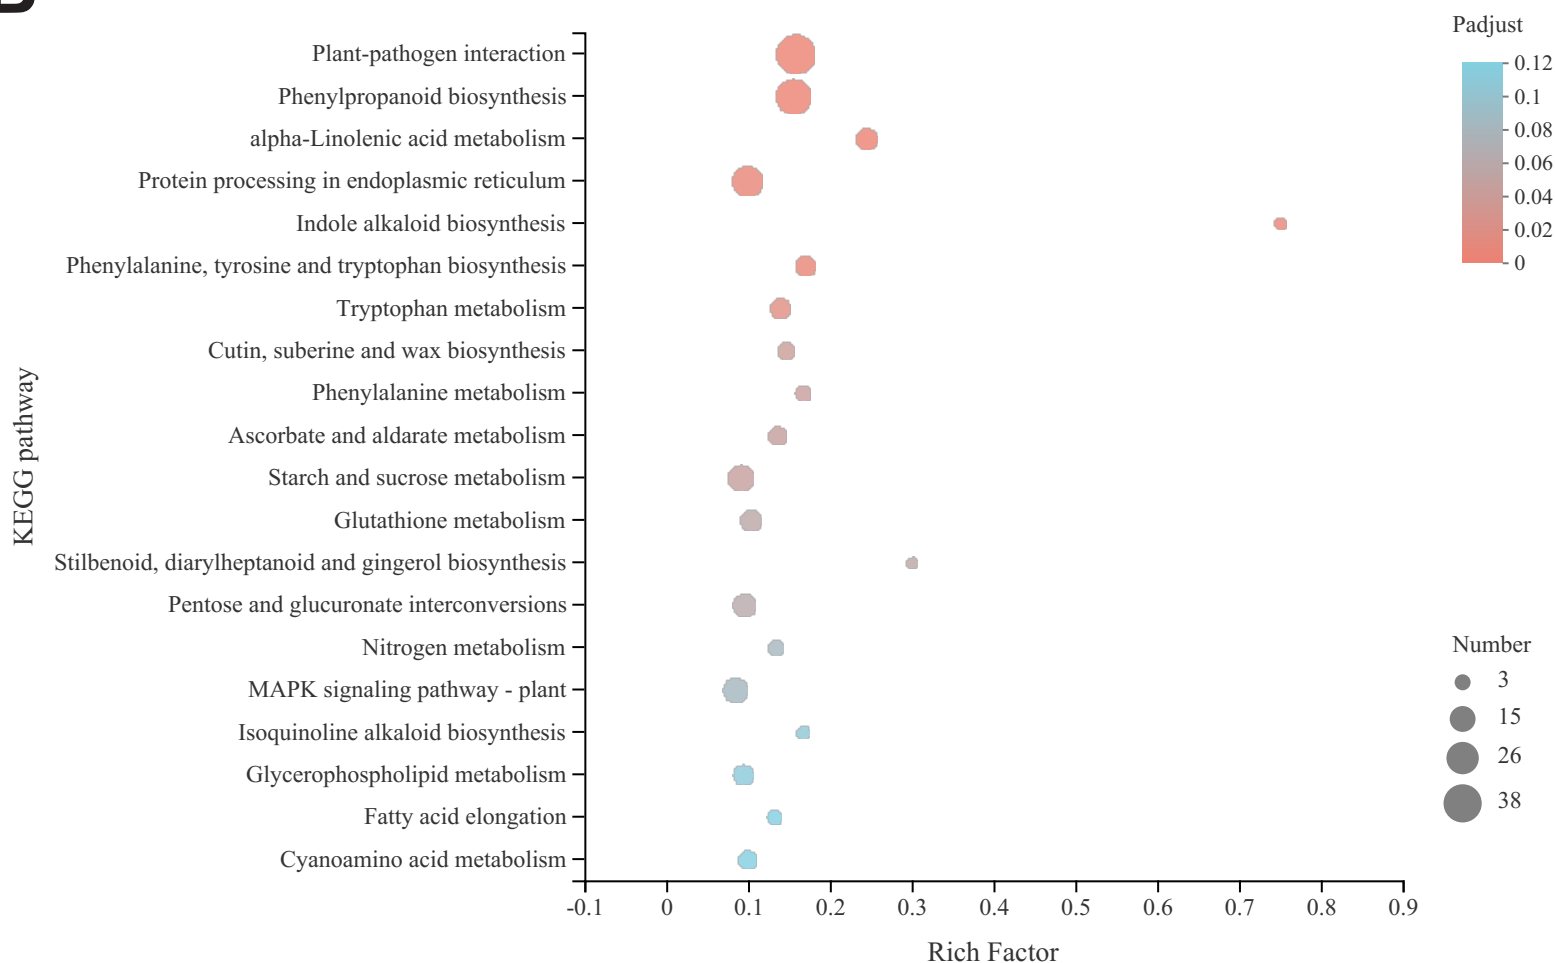

Supplement: s1 [file s1]

**A**

WT\_vs\_OEMTA.volcano

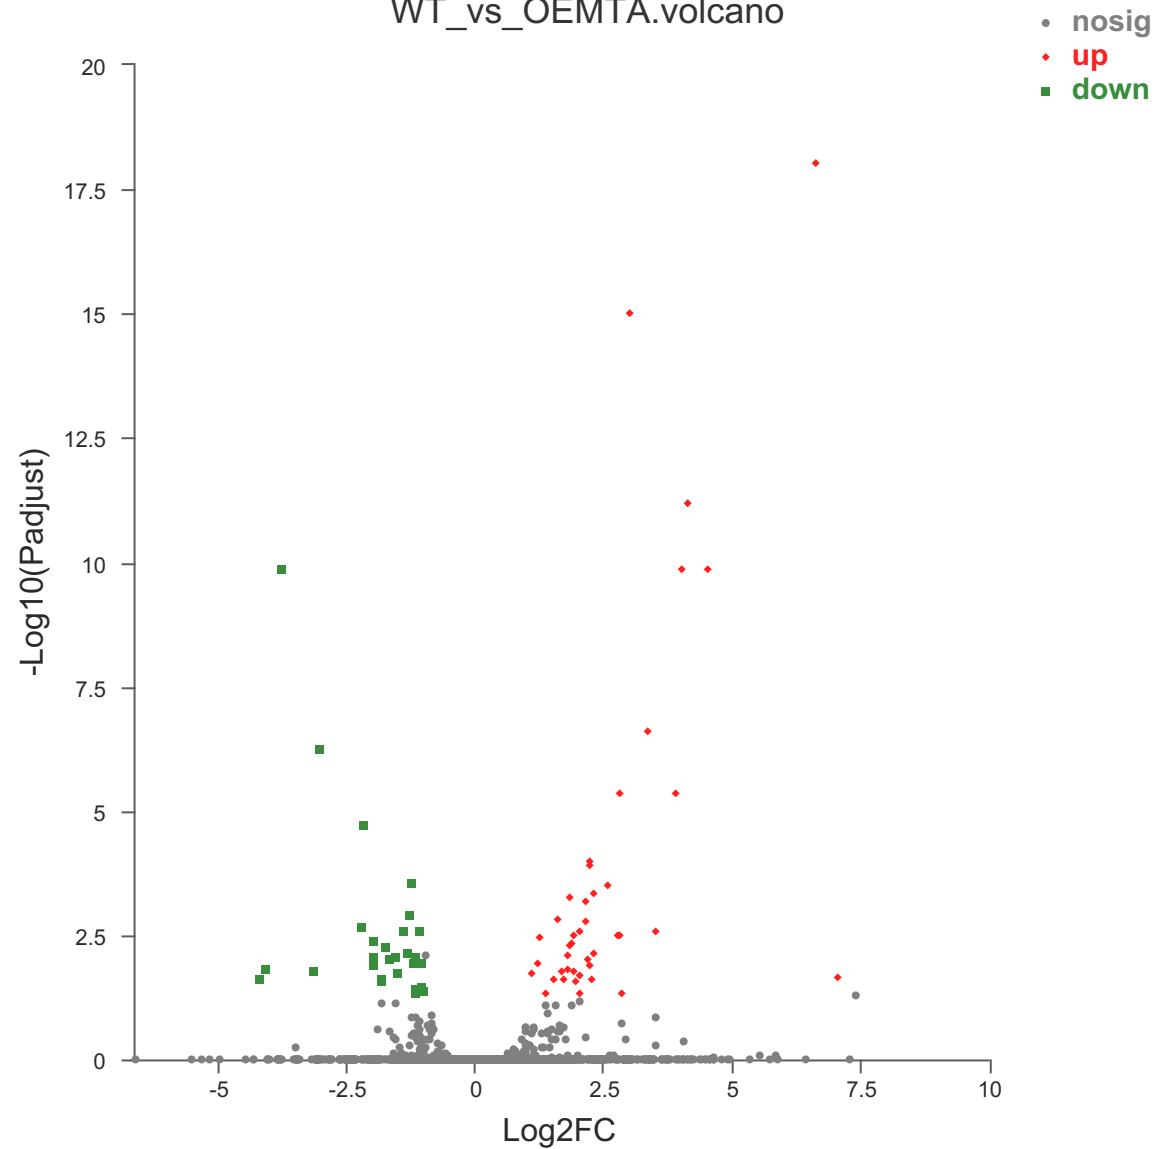**B**

WT\_vs\_OEMTB.volcano

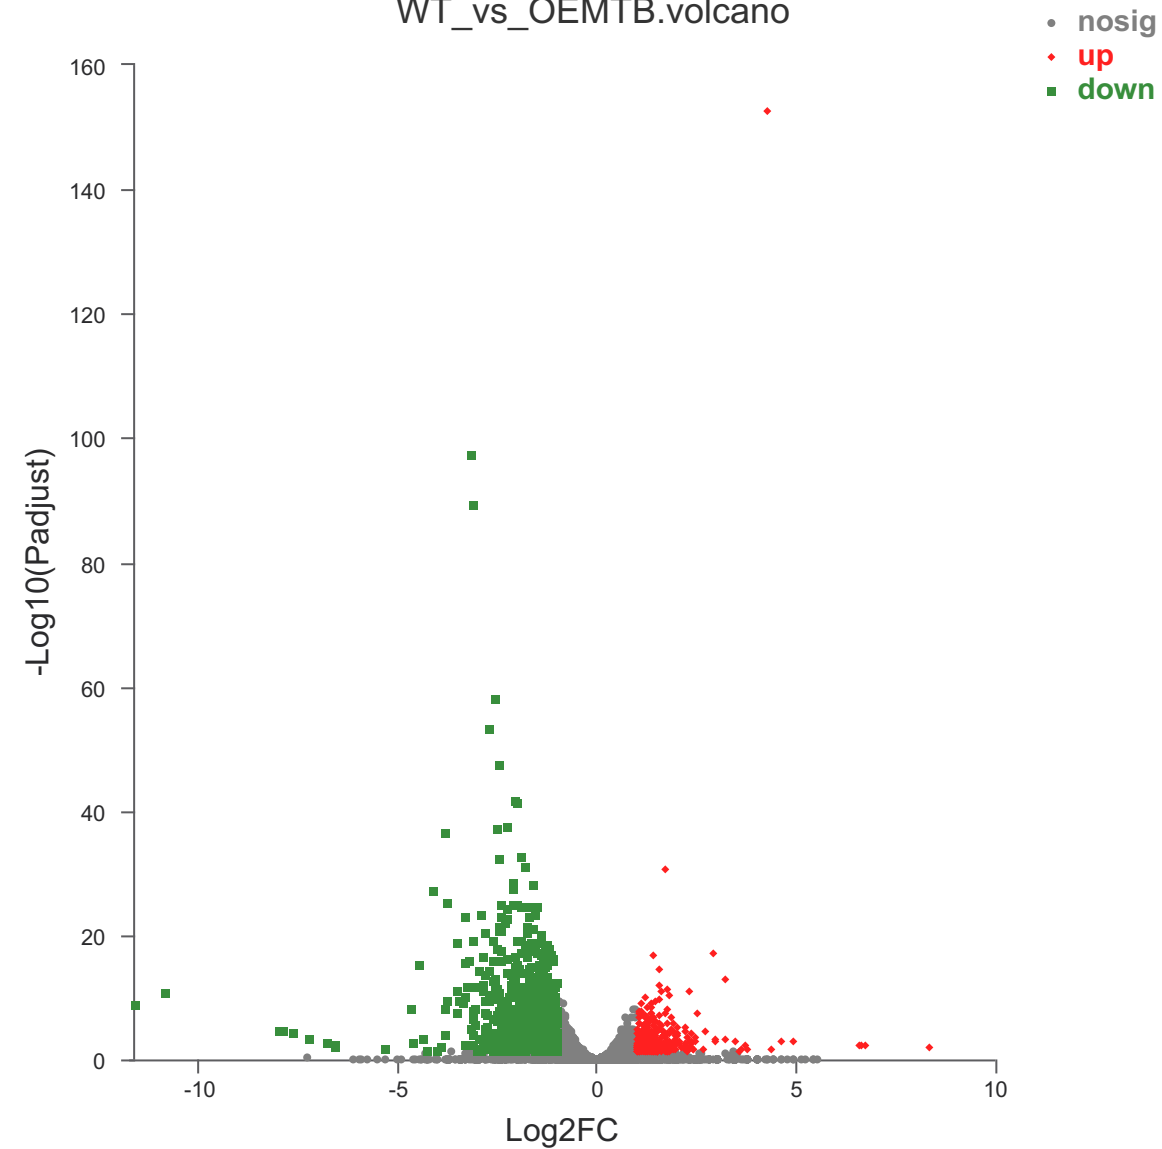

Supplement: s1 [file s1]

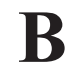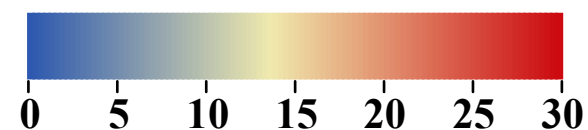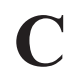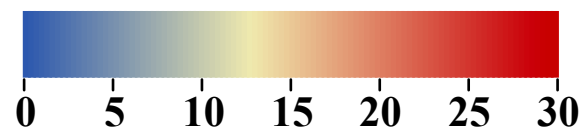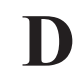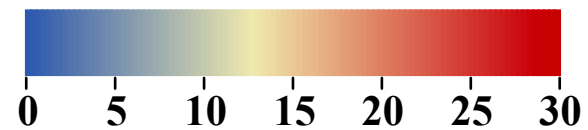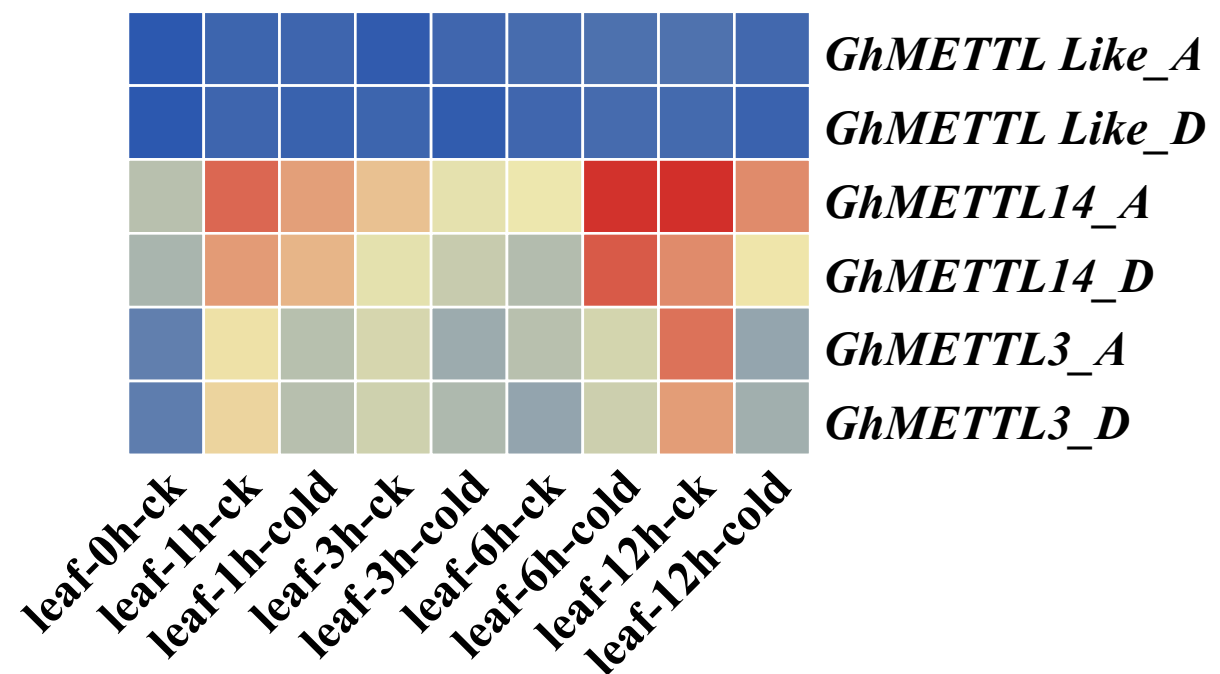

Supplement: s1 [file s1]

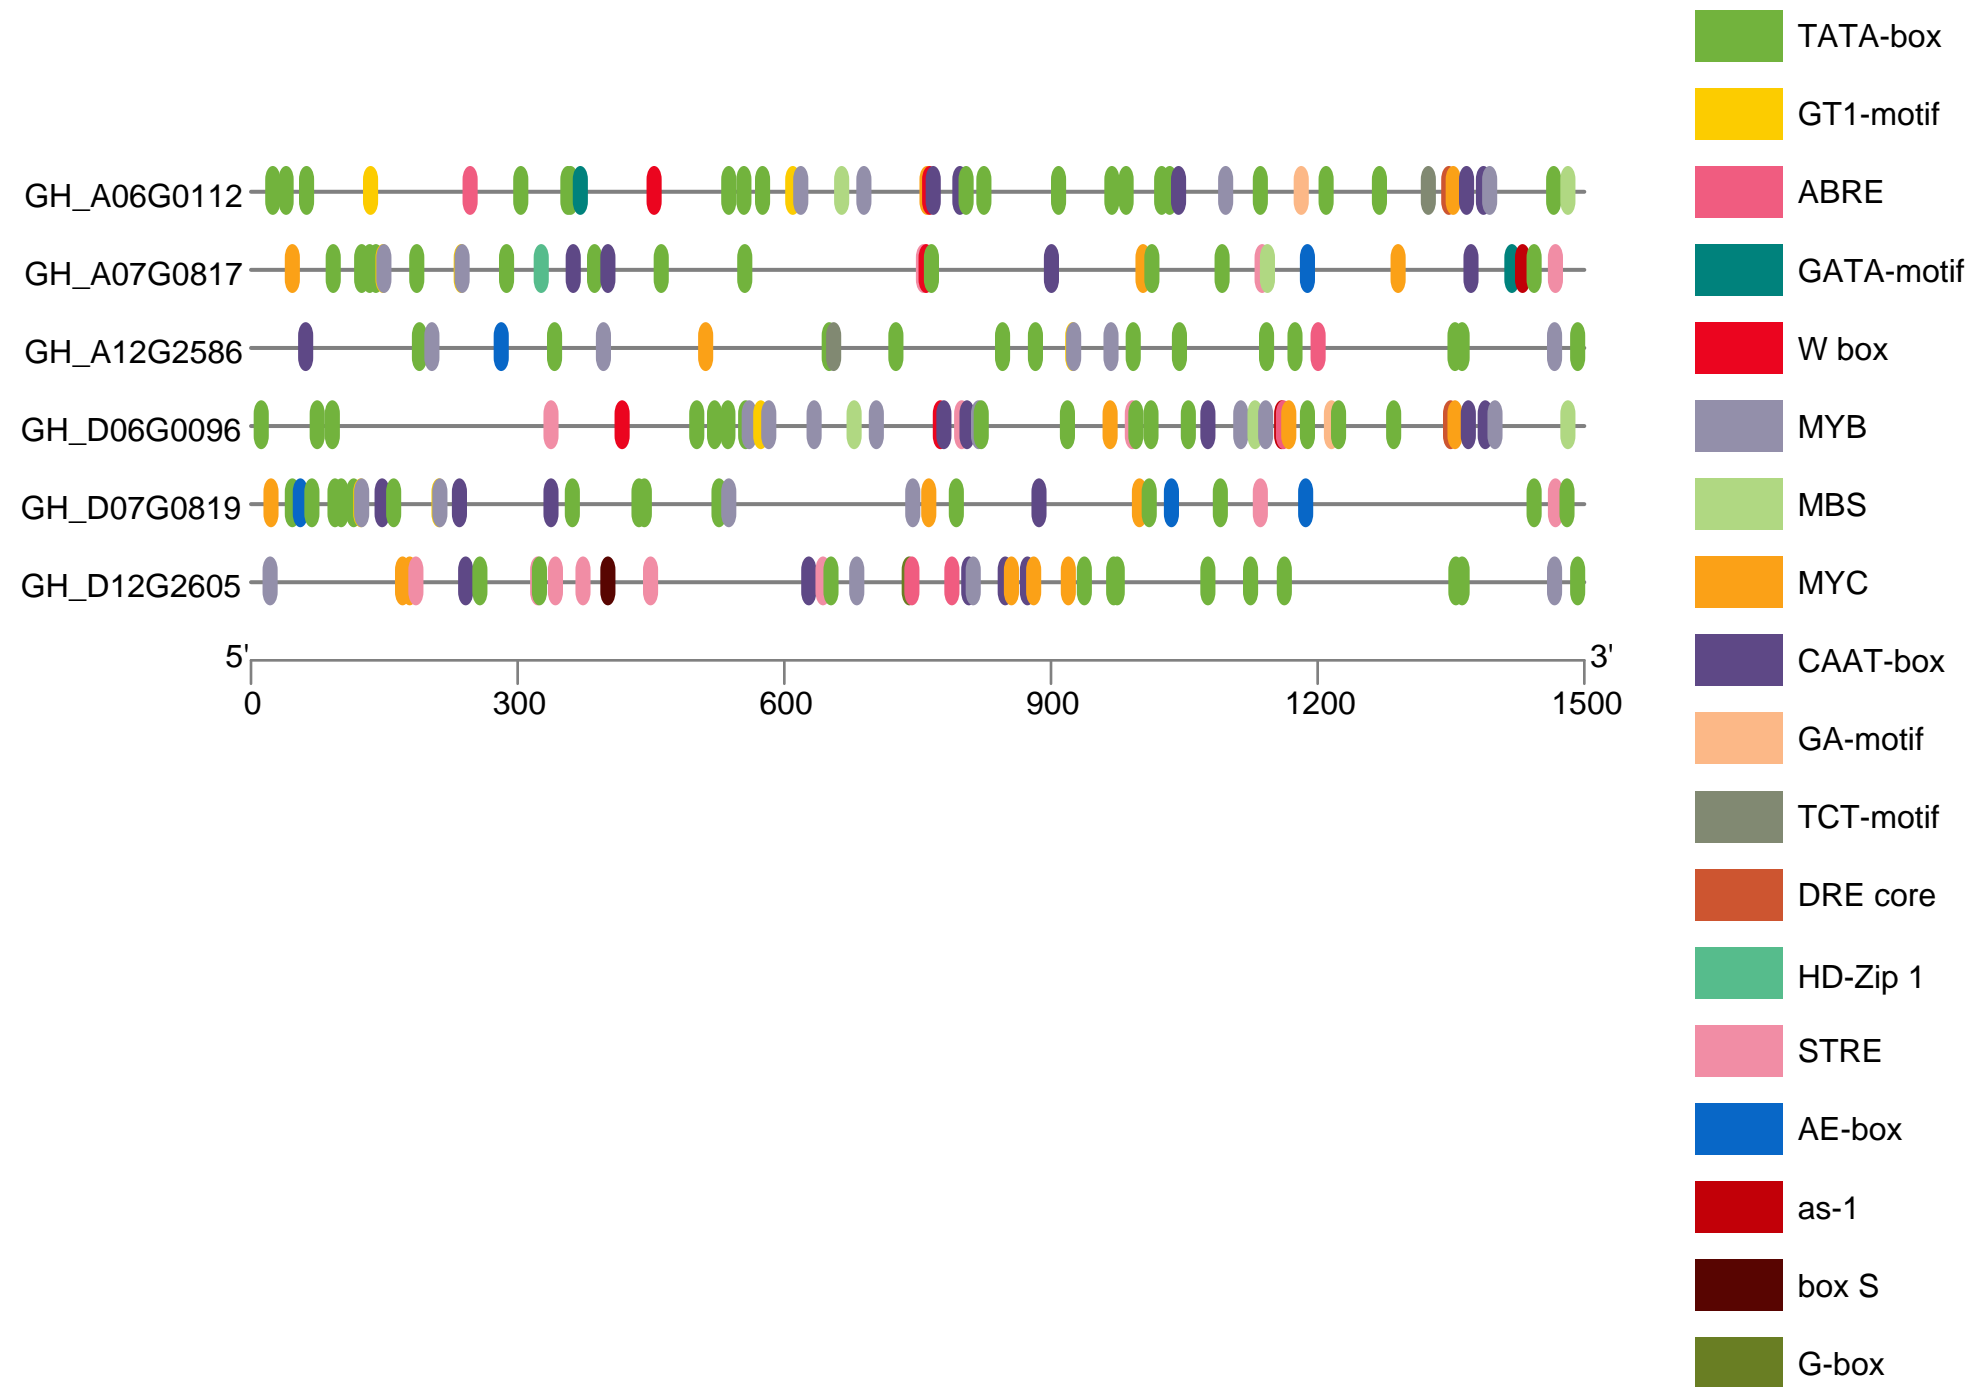

Supplement: s1 [file s1]

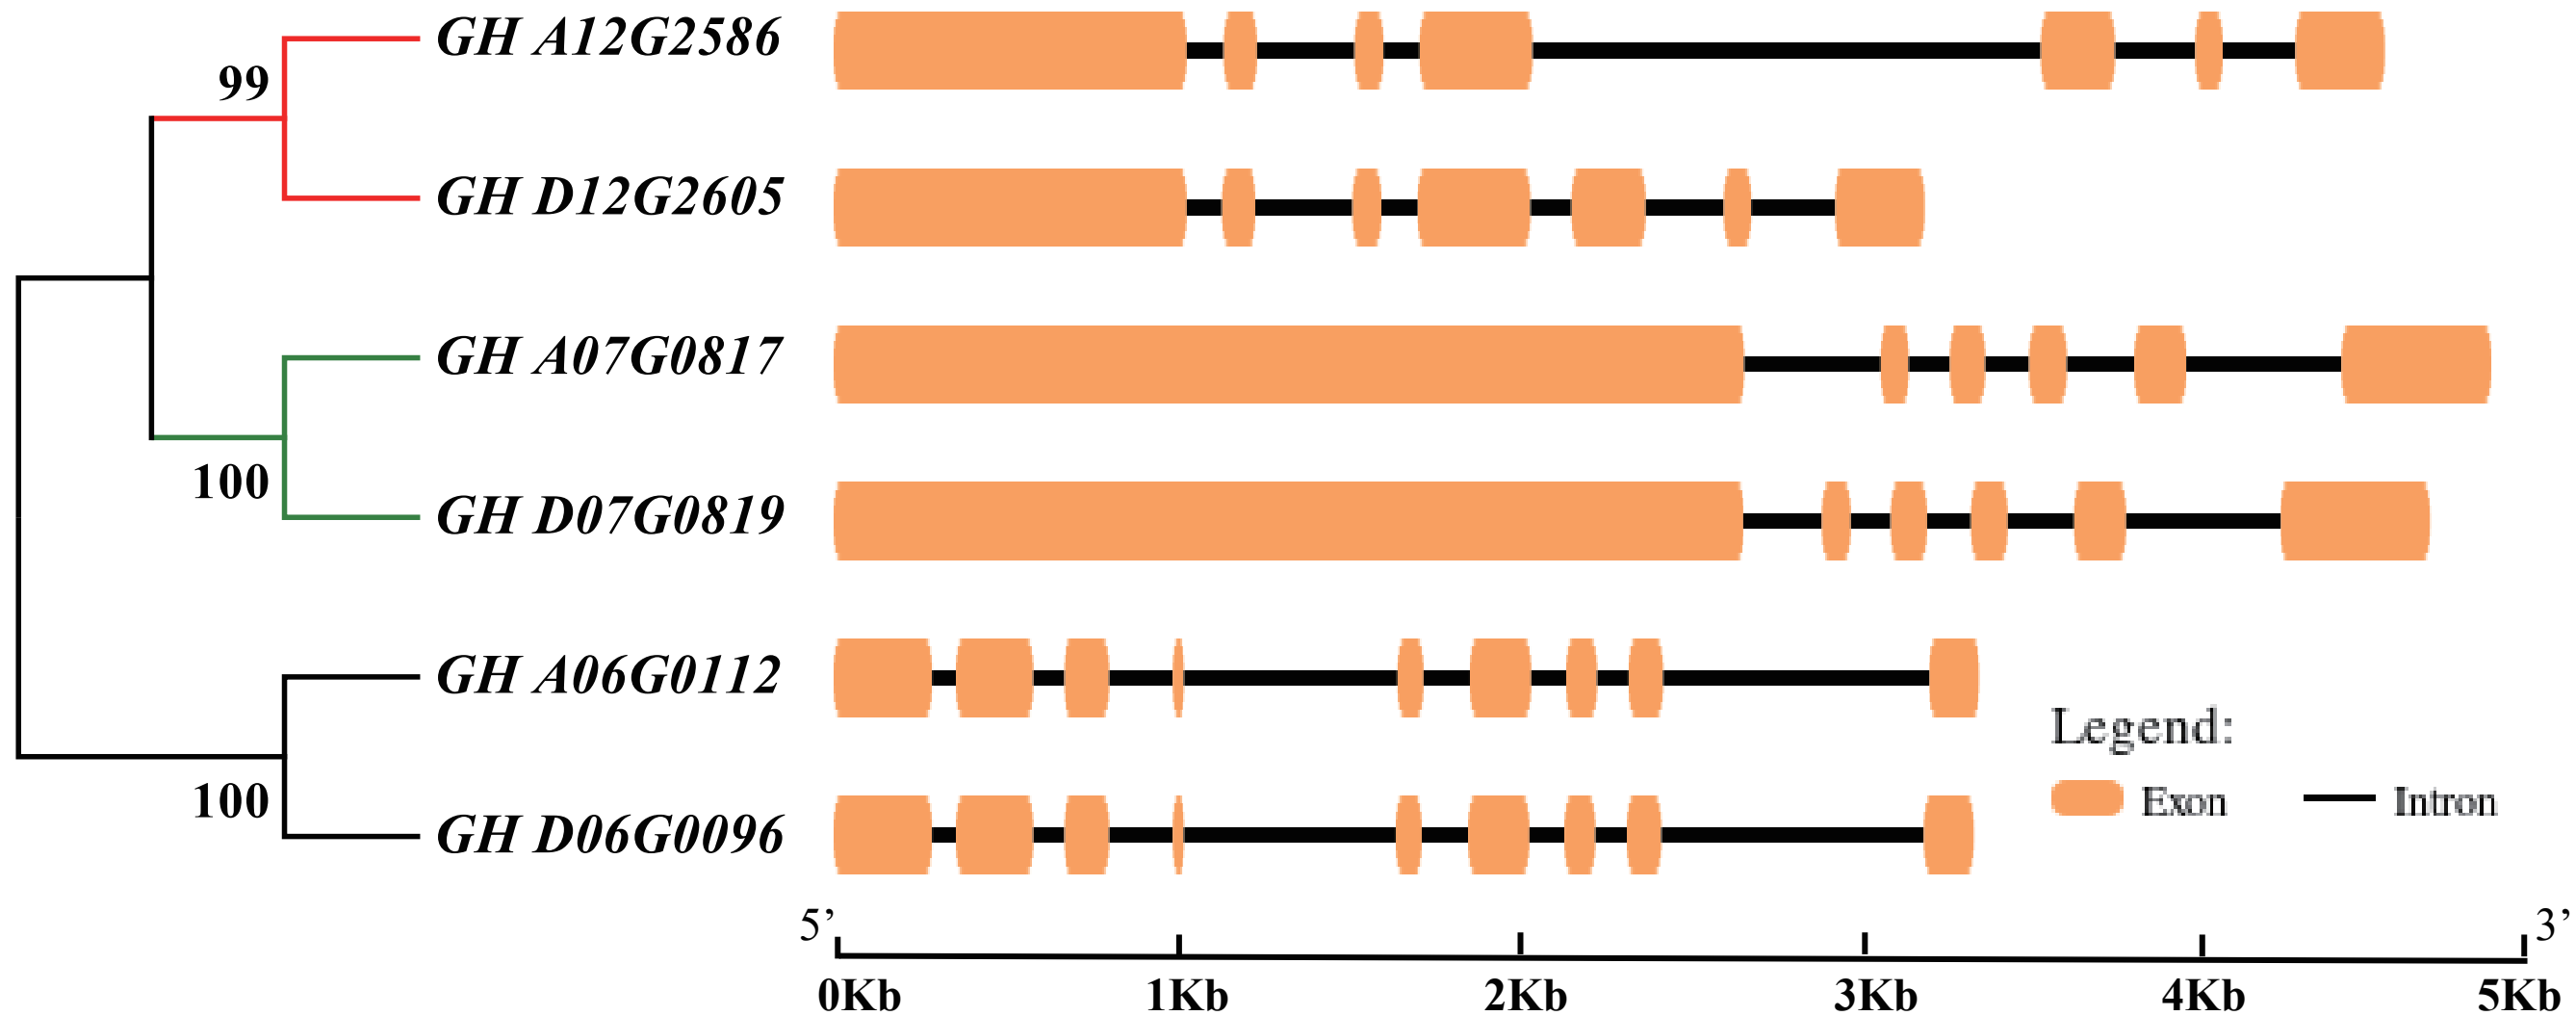

Supplement: s1 [file s1]
